# Supplementary material for: Matrix metalloproteinase-1 expression in breast carcinoma: a marker for unfavorable prognosis
Source: PubMed Central journal article supplement (PMC5710931; doi:10.18632/oncotarget.20557), 2017-08-24
Supplement: oncotarget-08-91379-s001.pdf [file oncotarget-08-91379-s001.pdf]

# Matrix metalloproteinase-1 expression in breast carcinoma: a marker for unfavorable prognosis

## SUPPLEMENTARY MATERIALS

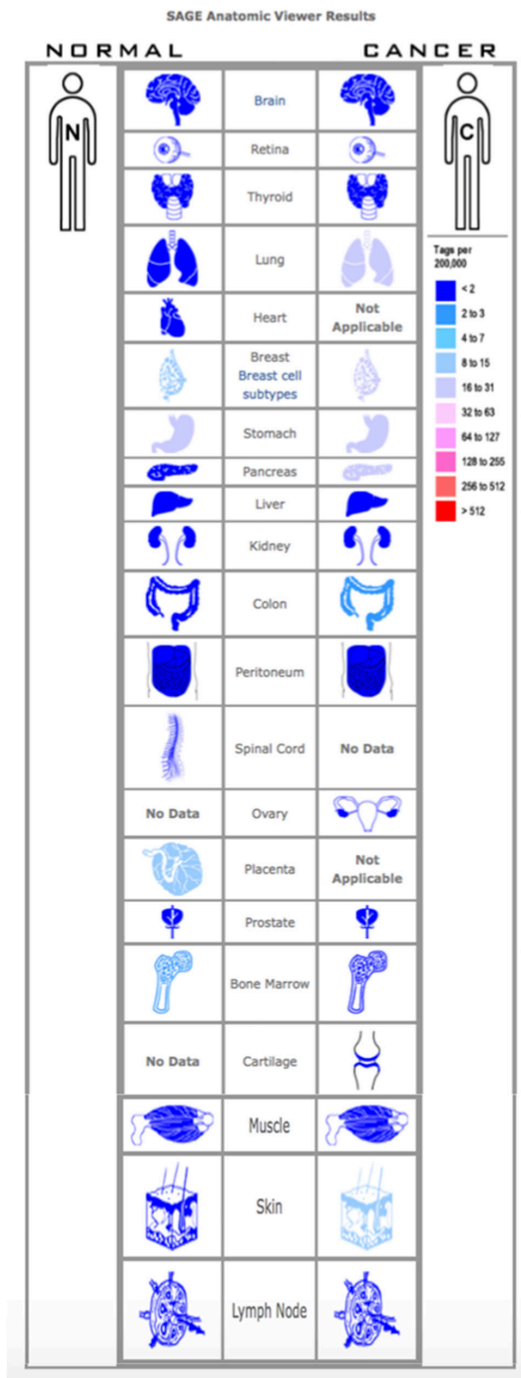

Supplementary Figure 1: Expression profile for MMP1 in common human cancers presented by the SAGE DGED.
